1 **Title**  
2 **Paradoxical consequences of early hippocampal damage: greater**  
3 **atrophy is associated with better recall, working memory and**  
4 **visuospatial perception in developmental amnesia**

5 **Authors/Affiliations**

6 Loïc J. Chareyron<sup>a</sup>, W.K. Kling Chong<sup>b</sup>, Tina Banks<sup>c</sup>, Mortimer Mishkin<sup>d</sup>, Neil Burgess<sup>c</sup>,  
7 Richard C. Saunders<sup>d</sup>, Faraneh Vargha-Khadem<sup>a\*</sup>

8 <sup>a</sup> Cognitive Neuroscience and Neuropsychiatry, Developmental Neurosciences, University  
9 College London Great Ormond Street Institute of Child Health, London, UK

10 <sup>b</sup> Developmental Imaging & Biophysics, University College London Great Ormond Street  
11 Institute of Child Health, London, UK

12 <sup>c</sup> Developmental Imaging & Biophysics, University College London Great Ormond Street  
13 Institute of Child Health, London, UK

14 <sup>d</sup> Laboratory of Neuropsychology, National Institute of Mental Health, National Institutes of  
15 Health, Bethesda, MD 20892.

16 <sup>e</sup> Institute of Cognitive Neuroscience, University College London, London, UK.

17 **Corresponding Author**

18 \* Faraneh Vargha-Khadem.

19 Email: [f.vargha-khadem@ucl.ac.uk](mailto:f.vargha-khadem@ucl.ac.uk)

20 **Abstract**

21 Despite bilateral hippocampal damage dating to perinatal or early-childhood  
22 period, patients with developmental amnesia (DA) exhibit well-developed  
23 semantic memory, but severely impaired episodic memory. It is not clear,  
24 however, whether the residual hippocampus plays a role in encoding and/or  
25 retrieval of new information, or the surrounding cortical areas rescue aspects of  
26 these critical cognitive memory processes after early injury. We used manual MRI  
27 segmentation to estimate the volume of three hippocampal subregions and three  
28 surrounding cortical areas in 23 patients with DA and 32 controls. In patients, the  
29 level of atrophy in CA-DG subregions and subicular complex was more than 40%  
30 while the atrophy of the uncus was moderate (-23%). In contrast, volumes of  
31 entorhinal, perirhinal and parahippocampal cortices were smaller than those of  
32 controls, but not statistically different. Patients' recall, Verbal IQ, Working  
33 Memory Index and Processing Speed Index scores correlated negatively with the  
34 volume of the uncus while spatial perception/immediate memory performance  
35 correlated negatively with the volume of the subicular complex. We propose that  
36 in patients with DA, no other structure can perform the function of the  
37 hippocampus in episodic memory. However, cognitive memory processing is  
38 compromised as a function of extent of atrophy in hippocampal subregions, such  
39 that the greater the damage, the more likely that preserved surrounding cortical  
40 areas will be recruited to rescue the putative functions of the damaged subregions.  
41 Our findings document for the first time not only the extent, but also the limits of  
42 circuit reorganization occurring in the young brain following bilateral  
43 hippocampal damage.

## 44 **Introduction**

### 45 ***Developmental amnesia***

46 We previously identified a group of patients with hippocampal atrophy who had  
47 suffered hypoxic-ischaemic episodes in infancy or childhood and later developed  
48 a memory disorder differing from that commonly described in patients with adult-  
49 onset amnesia of temporal-lobe origin. In the latter cases, the disorder most often  
50 takes the form of a global anterograde memory loss [i.e. one affecting both  
51 episodic and new post-injury semantic memory, and severely restricting recall and  
52 recognition processes (Bayley and Squire, 2005; Manns et al., 2003; Scoville and  
53 Milner, 1957; Verfaellie et al., 2000)]. In patients with hippocampal damage of  
54 early-onset, by contrast, the disorder is more limited, being characterized by  
55 markedly impaired episodic memory, recall/recollection, and spatial processing  
56 deficits, but relatively preserved semantic memory, working memory, and  
57 recognition performance. We have labeled this dissociated form of memory  
58 function ‘developmental amnesia’ (DA, Guderian et al., 2015; Patai et al., 2015;  
59 Picard et al., 2013; Rosenbaum et al., 2015; Vargha-Khadem et al., 1997). Given  
60 the early onset of hippocampal damage, the compensatory organization that has  
61 occurred in patients with DA is likely to be distinct from what is observed in  
62 patients with hippocampal damage acquired in adulthood. Also, in patients with  
63 acquired hippocampal lesions, the damage has occurred to already-established,  
64 and normally-functioning memory circuits, whereas in patients with DA, the early  
65 bilateral lesions have probably led to the development of a different memory  
66 system. For these reasons, it is difficult, and somewhat inappropriate, to compare  
67 memory function and cognitive profiles in patients with DA to those of patients  
68 with adult-onset amnesia (Elward and Vargha-Khadem, 2018, P: 24-26).

69 To date, a cohort of 18 patients with DA has been reported, each patient  
70 having suffered an episode of hypoxia-ischaemia in early life (Dzieciol et al.,  
71 2017). Importantly, irrespective of the underlying aetiology (Geva et al., 2020), or  
72 age at onset (Vargha-Khadem et al., 2003), the hypoxic-ischaemic event was the  
73 cause of hippocampal damage and cognitive impairment (Cooper et al., 2015).

### 74 ***Memory circuit reorganization***

75 Among the many questions that have arisen from the study of patients with DA,  
76 the foremost concerns the regions of the medial temporal lobe (MTL) and/or  
77 preserved hippocampal subregions that could be involved in memory circuit  
78 reorganization following early hippocampal damage.

79 In the model of hierarchical organization of cognitive memory proposed  
80 by Mishkin and colleagues (1997; see also: Baddeley, 2020; Vargha-Khadem and  
81 Cacucci, 2021), recollection and familiarity depend on different MTL structures.  
82 According to this model, the perihippocampal gyrus, and in particular the  
83 perirhinal cortex, may support familiarity, while the hippocampus may support  
84 recollection (Argyropoulos et al., 2021). The selectivity of impairment observed  
85 in patients with DA has provided strong support for this dual-process model.

86 Because patients with DA have both neuroradiological and quantitatively-  
87 confirmed bilateral hippocampal atrophy, but no visible abnormality within the  
88 parahippocampal region, it has been proposed that their episodic memory  
89 impairment, and recall/recollection deficits are due to their hippocampal  
90 pathology, whereas their relatively intact semantic memory, and

91 recognition/familiarity processes are due in part to the preservation of the  
92 perihippocampal gyrus.

### 93 *Hippocampus*

94 Hypoxia-ischemia is known to differentially affect the hippocampal fields and  
95 subdivisions. Studies of animal models of cerebral ischemia have reported that a  
96 brief episode results in selective neuronal death in the CA1 field of the  
97 hippocampus (Schmidt-Kastner and Freund, 1991) while the adjacent CA3  
98 remains less vulnerable (Wang and Michaelis, 2010). In humans, while damage to  
99 CA1 is consistently reported following cerebral ischemia, damage to additional  
100 hippocampal regions is much more variable (Bartsch et al., 2015). Postmortem  
101 examinations of patients who suffered ischemic episodes in adulthood have  
102 reported neural cell loss either restricted to the CA1 region, or distributed in the  
103 dentate gyrus, subiculum, uncus and entorhinal cortex (Rempel-Clower et al.,  
104 1996; Zola-Morgan et al., 1986). The preservation of circumscribed hippocampal  
105 subregions following injury of early-onset in DA could account for the increased  
106 activation of the residual hippocampus during different memory tasks (Maguire et  
107 al., 2001; Rabin et al., 2016), although activation *per se* does not necessarily  
108 imply correspondingly intact function (Elward et al., 2021).

109 In the study reported by Dzieciol and colleagues (Dzieciol et al., 2017), the  
110 degree of hippocampal atrophy in patients with DA ranged from 28% to 62%  
111 compared to healthy controls. This large range of hippocampal volume reduction  
112 in this cohort suggests that there may indeed be variability in the hippocampal  
113 response to hypoxia-ischemia at the level of hippocampal subregions. It would  
114 thus be possible to assess whether the compensatory response in patients with DA  
115 is dependent on the extent of atrophy in the hippocampal subregions. One way to  
116 address this is to evaluate the association between task-dependent  
117 neuropsychological performance and volumes of hippocampal subregions

### 118 *Perihippocampal gyrus*

119 While postmortem examinations have reported some neural cell loss in layers of  
120 entorhinal cortex in patients who suffered ischemic episodes in adulthood  
121 (Rempel-Clower et al., 1996), it was reported that the volume of the  
122 parahippocampal gyrus was not significantly reduced in patients with adult-onset  
123 amnesia presenting with bilateral hippocampal damage (Shrager et al., 2008). A  
124 cortical thickness analysis performed in a single patient with DA didn't find  
125 abnormality in the subhippocampal structures within the medial temporal lobe,  
126 including the perirhinal and ventral entorhinal cortices (Jonin et al., 2018). Also, a  
127 recent study demonstrated that parahippocampal activity during scene  
128 reinstatement in patients with DA was similar to controls (Elward et al., 2021).  
129 However, the structural integrity of the perihippocampal gyrus, and by  
130 implication, the integrity of the hypothesized substrate of semantic memory and  
131 other preserved mnemonic processes remain to be quantitatively assessed in  
132 patients with DA.

133  
134 Here, we have used manual segmentation of MRI scans to obtain estimates of the  
135 volume of three hippocampal subregions: the uncus [uncal portion of the  
136 hippocampus (Zeidman and Maguire, 2016)], the CA-DG (including CA fields  
137 and dentate gyrus) and the subicular complex (including subiculum, presubiculum  
138 and parasubiculum), and three surrounding cortical areas (entorhinal, perirhinal

139 and parahippocampal cortices) in patients with DA and healthy controls. Controls  
140 and patients were assessed with neuropsychological tests of intelligence (WISC or  
141 WAIS), recall/recognition for verbal and visual material (Doors and People Test)  
142 and spatial perception/memory (Four Mountains Test). Finally, we investigated  
143 the relationships between degree of atrophy of hippocampal subregions and  
144 cognitive deficits.

145 We predicted that: (i) residual hippocampal subregions and/or surrounding  
146 cortical areas were sufficiently preserved to rescue some aspects of hippocampal  
147 function, and (ii) plastic changes in these regions occurred as a function of  
148 hippocampal damage in all patients with DA.

149 We documented several paradoxical inverse relationships: i) between the  
150 volume of the residual uncus and patients' recall memory performance, Verbal  
151 Comprehension Index, Working memory Index and Processing Speed Index, and  
152 ii) between the volume of the residual subicular complex and patients'  
153 performance on spatial perception/memory. We also reported an absence of  
154 structural damage in the surrounding cortical areas in patients with DA.

## 155 Results

### 156 Volumetric estimates

157 Three hippocampal subregions (uncus, CA-DG and subicular complex) and three  
158 surrounding cortical areas (entorhinal, perirhinal and parahippocampal cortices)  
159 were manually segmented in healthy controls (N = 32) and DA (N = 23) groups  
160 (Fig. S1).  
161

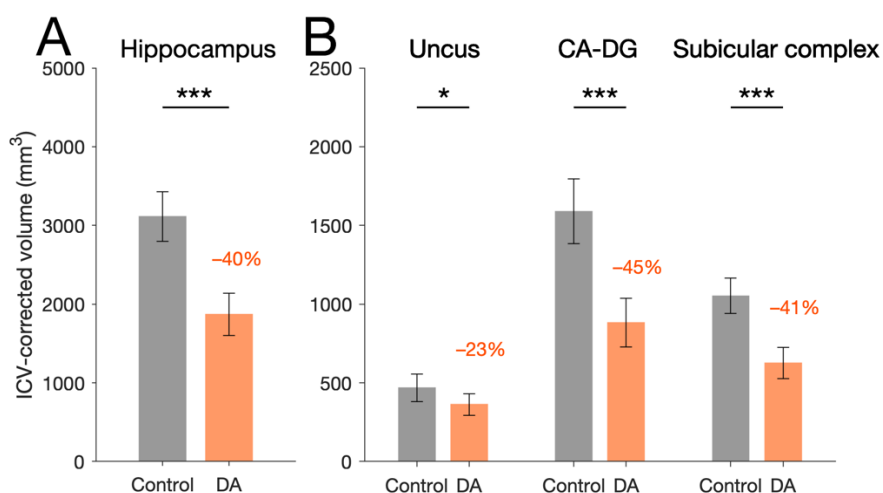

162 **Fig. 1. Volume of the hippocampus and its subregions.** Volume of the hippocampus (A.)  
163 and its subregions (B., uncus, CA-DG, and subicular complex) in control (grey; N = 32) and  
164 DA (orange; N = 23) groups. Data are represented as mean  $\pm$  SD. Percentage values refer to  
165 the mean difference to control group. Volumes are calculated as the average of left and right  
166 hemisphere volumes. All volumes are corrected for intracranial (ICV) volume. \*: P < .05;  
167 \*\*\*: P < .001.  
168

169  
170 The volume of the hippocampus as a whole was 40% smaller in the DA than in  
171 the control group (range: -26% to -53%;  $t_{(53)} = -15.32$ ; P < .001) (Fig. 1; Table  
172 S1). The volume of the hippocampal subregions was also significantly smaller in  
173 the DA than in the control group (2-way ANOVA,  $F_{(1,159)} = 392.5$ , P < .001). The

174 uncus was 23% smaller (range: +4% to -49%; Tukey's HSD post-hoc test:  $P =$   
175 .037), the CA-DG subregions were 45% smaller (range: -28% to -59%;  $P <$   
176 .001), and the subicular complex was 41% smaller (range: -22% to -56%;  $P <$   
177 .001). The level of atrophy of the patients' hippocampal subregions differed  
178 significantly from each other ( $F_{(2,66)} = 23.0$ ,  $P < .001$ ). Tukey's HSD post-hoc test  
179 indicated that the CA-DG and subicular complex showed greater atrophy than the  
180 uncus (both  $P < .001$ ).

181 Atrophy of the hippocampus in the DA group was significantly lower in its  
182 anterior (-36%) than its posterior (-44%) segment (paired t test,  $t_{(22)} = 2.72$ ,  $P =$   
183 .012; Fig. S2). Because no differences were observed between the anterior and the  
184 posterior segment of the CA-DG (paired t test,  $t_{(22)} = 0.94$ ,  $P = .36$ ) or subicular  
185 complex ( $t_{(22)} = 1$ ,  $P = .33$ ) subregions, the lower level of atrophy observed in the  
186 anterior part of the whole hippocampus can be attributed to the relatively more  
187 preserved uncus.

188 In contrast, there was no significant difference in the volume of the entorhinal,  
189 perirhinal and parahippocampal cortices between control and DA groups (Table  
190 S1; 2-way ANOVA,  $F_{(1,159)} = 6.7$ ,  $P = .010$ ; Tukey's HSD post-hoc tests, all  $P >$   
191 .35). Also, we didn't observe any correlation between the volume of the  
192 hippocampus or hippocampal subregions and the volume of surrounding cortical  
193 areas in patients with DA (Pearson's correlation analysis, all  $P > .19$ ).

#### 194 ***Neuroradiological assessment***

195 Neuroradiological ratings based on visual inspection of the MR images provided  
196 independently by one of the authors (WKC) revealed abnormally small fornix and  
197 mammillary bodies in all but two patients with DA (Table S2). No abnormalities  
198 were detected in the parahippocampal gyrus (perirhinal, entorhinal, and  
199 parahippocampal cortices), or the thalamus, and the basal ganglia. Additional  
200 visible abnormality was observed in some cases in the white matter and the  
201 cerebellum. The pattern of visible abnormality detected within the hippocampal  
202 circuit, and the notable absence thereof in other cortical and subcortical structures,  
203 was consistent across individual patients irrespective of their varying aetiology,  
204 and age at hypoxic-ischaemic-induced hippocampal damage.

#### 205 ***WISC/WAIS***

206 All patients with DA ( $N = 23$ ) and 23 of the control participants were assessed on  
207 the WISC or WAIS. Patients were impaired relative to our group of controls only  
208 for the Perceptual Reasoning Index scores (2-way ANOVA,  $F_{(1,176)} = 10.61$ ,  $P =$   
209 .001; Tukey's HSD post-hoc test,  $P = 0.04$ ; all other  $P > .25$ ). There were  
210 significant inverse correlations between the volume of the uncus and patients'  
211 scores for the Verbal Comprehension Index (VCI), the Working Memory Index  
212 (WMI) and the Processing Speed Index (PSI) (all  $r_{(22)} < -0.42$ ; all  $P < .05$ ; Fig 2).  
213 Looking at PSI scores, we observed an inverse correlations between "Digit  
214 Symbol-Coding" score and the volume of the uncus ( $r_{(22)} = -0.44$ ;  $P = .037$ ) and  
215 between "Symbol Search" and the volume of the uncus and subicular complex  
216 ( $r_{(22)} = -0.43$ ;  $P = .04$  and  $r_{(22)} = -0.44$ ;  $P = .037$ , respectively; Table S3). No  
217 other correlations for other ROIs in the DA group were significant. In controls, the  
218 WMI scores were positively associated with the volume of the subicular complex  
219 ( $r_{(22)} = 0.46$ ;  $P = .029$ ).

220

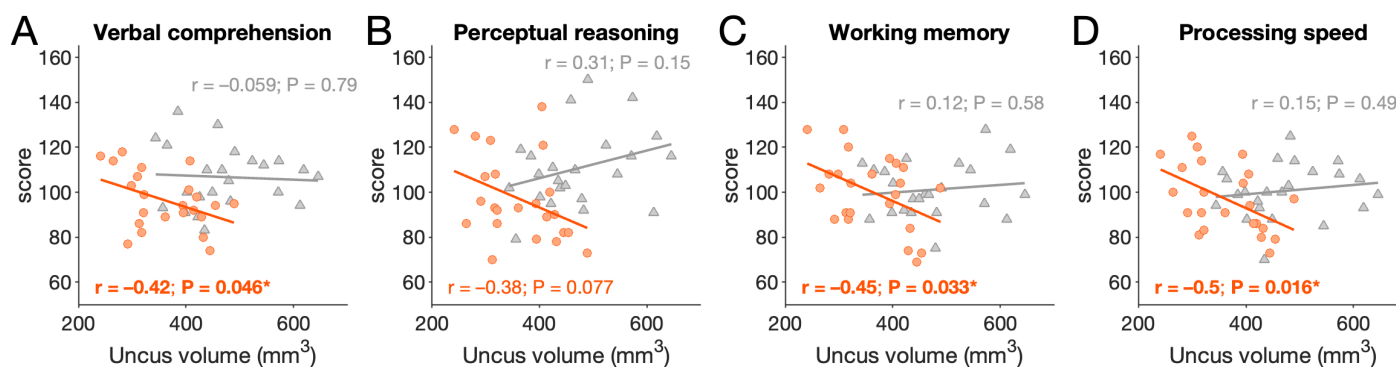

222 **Fig. 2. Inverse correlations between WISC/WAIS indexes scores and the volume of the**  
223 **uncus in patients with DA.** Participants' scores on Wechsler Intelligence Scales WISC or  
224 WAIS (patients: orange circles, N = 23; controls: grey triangles, n = 23). **A.** Verbal  
225 comprehension Index; **B.** Perceptual Reasoning Index; **C.** Working Memory Index; **D.**  
226 Processing Speed Index. Pearson's correlation coefficient. All volumes are corrected for  
227 intracranial (ICV) volume. \*:  $P < .05$ .

228

### 229 *Doors and People Test*

230 All patients with DA (N = 23) and 21 of the control participants were assessed on  
231 the Doors and People Test, which provides equated measures of recognition and  
232 recall in the visual and verbal domains. All patients' subtest scores were  
233 significantly below zero (Wilcoxon signed rank test: all  $Z < -2.4$ , all  $P < .016$ ),  
234 indicating that patients were impaired relative to controls (who represent zero, as  
235 their scores were used to convert raw scores into z-scores). The patients' scores  
236 for the four Doors and People subtests differed significantly from each other  
237 (Friedman's test:  $\chi^2_{(3,n=22)} = 43.7$ ,  $P < .001$ ). The visual recall ('Shapes') subtest  
238 yielded a significantly greater deficit than all of the other subtests (all  $P < .001$ ).  
239 The degree of deficit on the verbal recall ('People') subtest was greater than on  
240 the two recognition subtests (both  $P < .02$ ). The degree of deficit was greater on  
241 the visual recognition ('Doors') subtest than on the verbal recognition ('Names')  
242 subtest ( $P = .001$ ). Collapsing across subtests, we found a greater deficit in recall  
243 compared with recognition ( $Z = -4.04$ ;  $P < .001$ ), and a greater deficit in memory  
244 for visual compared with memory for verbal material ( $Z = -4.11$ ;  $P < .001$ ).

245 We observed significant negative correlations between the two recall  
246 subtest scores and the volume of the uncus in the DA group [Verbal recall  
247 ('People'): Pearson's  $r_{(22)} = -0.47$ ;  $P = .02$ ; Visual recall ('Shapes'):  $r_{(22)} = -0.55$ ;  
248  $P = .007$ ]. No other correlations for other subtests or other regions of interest in  
249 the DA group were significant (all  $P > .09$ ; Table S4). Collapsing across test  
250 material confirmed that scores on recall were inversely correlated with the volume  
251 of the uncus in the DA group ( $r_{(22)} = -0.58$ ;  $P = .004$ ; Fig. 3A). As a corollary, we  
252 observed that patients with more preserved uncus had significantly lower scores  
253 on recall than patients with more damaged uncus ( $Z = -2.74$ ;  $P = .006$ ). In the  
254 control group, no correlations for any subtests or regions of interest were  
255 significant (all  $P > .11$ ; Table S4).

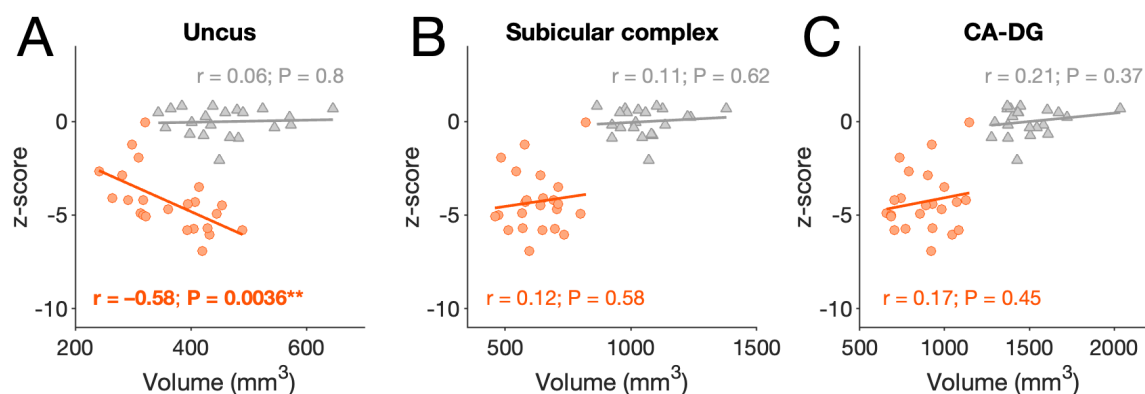

256

257

258

259

260

261

262

263

264

265

266

267

268

269

270

271

272

273

274

275

276

277

278

279

280

281

282

283

**Fig. 3. Doors and People recall scores correlations with the volumes of hippocampal subregions.** The patients' scores (orange circles; N = 23) on recall subtests of the *Doors and People Test* correlated negatively with the volume of the uncus (A.) but not with the volumes of the subicular complex (B.) or CA-DG (C.). The controls' scores (grey triangles; n = 21) did not correlate with the volume of any subregion. Pearson's correlation coefficient. All volumes are corrected for intracranial (ICV) volume. \*\*: P < .01.

During *Doors and People* testing, the procedures for recall subtests are repeated until all items (names or shapes) are correctly recalled, or for a maximum of three presentations. The patients' scores differed significantly from each other between the three trials of the visual recall ('Shapes') subtest (Friedman's test:  $\chi^2_{(2,n=20)} = 8.00$ , P = .018) and between the three trials of the verbal recall ('People') subtest ( $\chi^2_{(2,n=20)} = 14.15$ , P < .001). Post hoc Wilcoxon signed-ranks tests indicated that scores obtained on trial-1 were significantly lower than scores obtained on trial-3 for the visual recall ('Shapes') subtest (Z = -2.72; P = .006) and for the verbal recall ('People') subtest (Z = -2.88; P = .004). Interested to determine potential differences in learning between patients depending on whether they presented with severe or moderate uncus atrophy, we compared increases in patients' scores between trial-1 and trial-3. There was no difference in learning scores between patients with a larger uncus (above group mean volume) and patients with a smaller uncus (Mann-Whitney U test; visual recall ('Shapes'): Z = -1.26; P = .21; verbal recall ('People'): Z = 0.61; P = .54).

Delayed (cued) verbal and visual recall were tested after completion of the verbal and visual recognition subtests, respectively. We found a correlation between patients' scores for the delayed verbal recall ('People') subtest and the volume of the uncus (Pearson's  $r_{(20)} = -0.5$ ; P = .02) while the correlation with delayed visual recall ('Shapes') scores was not significant ( $r_{(20)} = -0.3$ ; P = .18).

284

#### **Four Mountains Test**

285

286

287

288

289

290

291

292

293

294

Fourteen patients with DA and 19 of the control participants were assessed on the *Four Mountains Test* to examine their perception and immediate memory for topographical information in spatial scenes. Patients' subtest scores converted to z-scores were not significantly below zero (Wilcoxon signed rank test: 'Spatial Perception': P = .75; 'Spatial Memory': P = .13), indicating that many of the patients were not impaired relative to our group of controls. Patients' scores were significantly lower for the 'Spatial Memory' than for the 'Spatial Perception' subtest (Z = -2.67; P = .008). There were significant inverse correlations between patients' scores for the 'Spatial Perception' and 'Spatial Memory' subtests and the volume of the subicular complex ( $r_{(13)} = -0.59$ ; P = .025 and  $r_{(13)} = -0.58$ ; P =

295 .03, respectively). Collapsing across test material confirmed that scores were  
296 strongly inversely correlated with the volume of the subicular complex in the DA  
297 group ( $r_{(13)} = -0.63$ ;  $P = .015$ ) (Fig. 4B). Patients' scores for the 'Spatial  
298 Perception' subtest were also negatively associated with the volume of the uncus  
299 ( $r_{(13)} = -0.54$ ;  $P = .047$ ). In the control group, no correlations for any ROIs were  
300 significant (all  $P > .49$ ; Table S5).

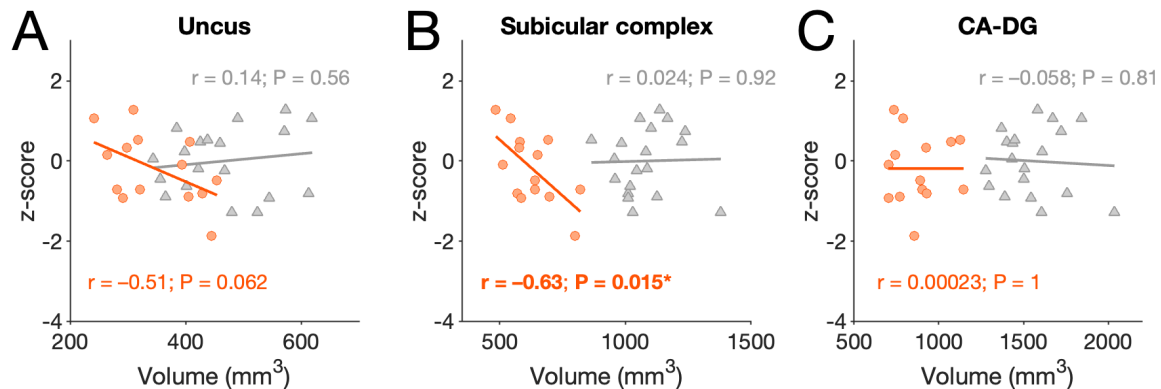

301

302 **Fig. 4. Four Mountains scores correlations with the volumes of hippocampal subregions.**

303 The patients' scores (orange circles;  $n = 14$ ) correlated negatively with the volume of the  
304 subicular complex (B.) but not with the volumes of the uncus (A.) or CA-DG (C.). The  
305 controls' scores (grey triangles;  $n = 19$ ) did not correlate with the volume of any subregion.  
306 Pearson's correlation coefficient. All volumes are corrected for intracranial (ICV) volume.

## 307 Discussion

308 In this study, we addressed the question of whether the volumes of residual  
309 hippocampal subregions and parahippocampal areas are associated with memory  
310 and spatial processing performance in patients with hypoxic-ischaemic-induced  
311 hippocampal damage of early-onset. Using a combination of neuropsychological  
312 test results and volumetric estimations in a large cohort of patients with  
313 developmental amnesia (DA), we documented several inverse relationships: i)  
314 between the volume of the residual uncus and patients' performance on recall  
315 memory, Verbal comprehension Index, Working memory Index and Processing  
316 speed Index, and ii) between the volume of the residual subicular complex and  
317 patients' performance on spatial perception/memory. The effects reported here  
318 suggest that following an early-life exposure to hypoxia-ischemia, the function of  
319 hippocampal subregions showing greater damage will more likely be compensated  
320 by preserved extra-hippocampal structures. By contrast, hippocampal subregions  
321 with milder injury could increase system disruption by maintaining their putative  
322 functions. Despite these compensatory reorganizations, hippocampal-dependent  
323 episodic memory recall remains irreversibly compromised.

## 324 Limitations

325 Although manual tracing is still the gold standard for measuring the volumes of  
326 hippocampal subregions and cortical areas on MRI acquisitions, manual  
327 segmentation is subjective and susceptible to measurement errors. Also, the  
328 precision of the measure is limited by the resolution of the MRI scans. However,  
329 analyses of MR images for estimating the extent of hippocampal damage in



330 amnesic patients have been validated by postmortem examinations (Rempel-  
331 Clower et al., 1996). In particular, a clear concordance has been reported in the  
332 appearance of the damaged hippocampus on the MRI and in the histological  
333 sections (Rempel-Clower et al., 1996). The border between cytoarchitectonic  
334 hippocampal subregions were estimated based on delineation of these regions on  
335 histological sections (Rosene and Van Hoesen, 1977). The delineation on MR  
336 images of the perihippocampal and parahippocampal cortical areas were based on  
337 that described in (Insausti et al., 1998). It is not clear to what extent these borders  
338 would be affected in the brains of DA patients with significant hippocampal  
339 volume reduction. Our observations of an absence of significant volume reduction  
340 of the entorhinal, perirhinal and parahippocampal cortices in patients with DA is  
341 consistent with previous report showing an absence of significant volume  
342 reduction in patients with adult-onset amnesia (Shrager et al., 2008), and in a  
343 patient with DA (Jonin et al., 2018). Also, intact parahippocampal activity during  
344 scene reinstatement has been described in patients with DA (Elward et al., 2021).

### 345 ***Differential effect of early hypoxia-ischemia on hippocampal subregions***

346 Our observation that the CA-DG were the most affected hippocampal subregions  
347 in patients with DA is congruent with documented reports of greater sensitivity of  
348 this subregion to hypoxia-ischemia. It has long been known that hypoxia and  
349 ischemia result in selective neuronal death in the CA1 field (Schmidt-Kastner and  
350 Freund, 1991), although the reason for this selectivity is still debated (Wang and  
351 Michaelis, 2010). Neurohistological studies of patients who suffered ischemic  
352 episodes in adulthood have reported cases with neural cell loss restricted to the  
353 CA1 region bilaterally whilst the CA1' region of the uncus, the subiculum, CA3  
354 and surrounding cortices were all preserved (Rempel-Clower et al., 1996; Zola-  
355 Morgan et al., 1986). High-resolution magnetic resonance imaging showed that  
356 CA1 was always affected in patients with hippocampal damage (Bartsch et al.,  
357 2015).

358 The subicular complex was less affected than the CA-DG subregion in  
359 patients with DA and this difference could be related to the different levels of  
360 maturation of the hippocampal subregions at birth. Quantitative volumetric  
361 measurements in non-human primates revealed that the subiculum, presubiculum  
362 and parasubiculum develop earlier than the dentate gyrus, CA3, and CA1 (Jabès et  
363 al., 2011) and this progressive maturation of the hippocampal circuits may  
364 participate in the differential protracted maturation of relational memory processes  
365 (Jabès and Nelson, 2015). The level of maturation of the hippocampal subregions  
366 at birth could also influence their vulnerability to hypoxia-ischemia (Vannucci  
367 and Hagberg, 2004).

368 In contrast, the uncus showed a low sensitivity to hypoxia in our patient cohort  
369 which could be a reflection of the distinct vascularization of this hippocampal  
370 subregion. The branches of the posterior cerebral artery (PCA) coming from the  
371 vertebral artery irrigate the posterior part of the hippocampus, while the branches  
372 of the anterior choroidal artery (AChA) originating from the internal carotid artery  
373 irrigate the uncus portion of the hippocampus (Erdem et al., 1993; Huther et al.,  
374 1998; Marinković et al., 1992). High-resolution angiography and anatomical  
375 studies have highlighted that the anterior hippocampal region could receive a  
376 mixed blood supply (from both the PCA and the AChA) in about half of the  
377 individuals (Erdem et al., 1993; Perosa et al., 2020). A mixed blood supply could

378 provide more vascular reserve and lower vulnerability to neuronal injury and  
379 atrophy (Liebeskind, 2003). The uncus, which receives a distinct blood supply  
380 compared to the rest of the hippocampus, might thus exhibit greater resistance to  
381 the adverse effects of hypoxic-ischemic events than the other hippocampal  
382 regions.

### 383 ***Uncus and recall memory***

384 The residual uncus could be partly functional in patients with DA and could be  
385 recruited for recall memory. We reported here that the volume of the uncus  
386 correlated negatively with recall scores as well as working memory performance  
387 in patients with DA. In the WAIS/WISC test, Working Memory Index is made up  
388 of two subtests (Digit Span and Letter Number Sequencing) both requiring verbal  
389 recall in the span of working memory. The function of the uncus is not well  
390 understood mainly because its structure-function mapping remains to be  
391 determined in rodents (Ding, 2013) but in humans, the uncus has been proposed to  
392 be involved in the long-term recall of scenes (Zeidman et al., 2015). Connectivity  
393 studies in nonhuman primates have shown that the uncus is less connected to  
394 other regions of the hippocampus, and that it has its own associational system of  
395 connections (Kondo et al., 2009). Notably, the uncus is also the only hippocampal  
396 region reciprocally connected to its contralateral counterpart (Amaral et al., 1984).  
397 The uncus' unique connectivity could allow this region to support some  
398 information processing despite severe damage to the other hippocampal areas.

399         Notwithstanding the importance of the uncus in relation to severity of  
400 atrophy during delayed recall, this subregion maintains its role during encoding  
401 and learning of memoranda in both low and high severity subgroups equally.  
402 Thus, we noted that despite their poor performance overall, both patient subgroups  
403 incrementally increased their scores across the three learning trials of the *People*  
404 and *Shapes* subtests of the *Doors and People Test*. The absence of a difference in  
405 performance between the subgroups during encoding and learning, but not during  
406 delayed recall, highlights the role of the uncus in retrieval of auditory verbal  
407 memory after a delay in patients with DA.

408         Interestingly, we also reported an inverse relationship between the volume of  
409 the uncus and patients' performance in delayed verbal, but not visual recall.  
410 Impairment in delayed verbal recall in relation to extent of atrophy of the uncus  
411 highlights the vulnerability of auditory verbal information to recall after a delay  
412 (Schulze et al., 2012).

### 413 ***Subiculum***

414 Residual circuits of the subicular complex might participate in spatial perception  
415 and spatial memory in patients with DA. Here, we reported inverse correlations  
416 between spatial perception/memory performance and the volume of the residual  
417 subicular complex in patients with DA. The subiculum receives its major  
418 excitatory input from CA1, but it also receives a strong projection from the  
419 entorhinal cortex (Amaral and Lavenex, 2007; Matsumoto et al., 2019; Witter and  
420 Amaral, 2020). The subiculum is also the main source of subcortical projections  
421 directed to the hippocampus, and the presubiculum receives the only direct input  
422 from the anterior thalamic nucleus (Amaral and Lavenex, 2007; Matsumoto et al.,  
423 2019). The subiculum, presubiculum and parasubiculum send dense projections to  
424 the entorhinal cortex (Saunders and Rosene, 1988; Witter and Amaral, 2020).

425 Thus, in the absence of functional CA-DG, the residual subicular complex could  
426 marginally participate in input processing through its other interconnections, and  
427 in particular, through interaction with the structurally preserved entorhinal cortex  
428 which constitutes the main entryway for much of the neocortical input reaching  
429 the hippocampus (Amaral et al., 1987).

430 Animal and human studies suggest that the subiculum plays an important role  
431 in spatial processing and spatial representation (Matsumoto et al., 2019). Grid,  
432 border, and head direction cells have been found in the subiculum of rodents and  
433 primates including humans (Boccaro et al., 2010; Lee et al., 2018; Lever et al.,  
434 2009; Robertson et al., 1999). In the rat, cross-structural interaction between the  
435 subiculum and the ventral striatum has been reported to be critical for spatial  
436 memory consolidation (Torromino et al., 2019). In humans, the subiculum is  
437 suggested to be specifically involved in scene-based cognitive processing,  
438 including scene perception and scene construction during memory recall (Dalton  
439 and Maguire, 2017; Hodgetts et al., 2017; Zeidman et al., 2015).

440 Interestingly, we did not observe correlations between the volume of the  
441 subicular complex and patients' performance on the non-spatial tasks of the *Doors*  
442 *and People Test*, suggesting that the subicular complex might be playing a more  
443 prominent role in the processing of spatial inputs.

444 The Processing Speed Index of the Wechsler Scales is made up of two  
445 subtests ('Coding' which requires learning and memory and 'Symbol Search'  
446 which requires visual scanning/cancellation, and visual stimulus matching, but  
447 without memory demands). Interestingly, the Coding scores are negatively  
448 correlated with the uncus volume while the Symbol Search scores are negatively  
449 correlated with both the uncus and the subicular complex. Our results tend to  
450 demonstrate that the hippocampus is involved in two cognitive processes of visual  
451 perception, and cognitive memory.

### 452 ***Working memory***

453 We reported here, in addition to an absence of working memory impairment, a  
454 negative association between uncus volume and working memory performance in  
455 patients with DA. The more established view proposes that the hippocampus plays  
456 an important role in episodic memory, spatial cognition, and navigation, while it  
457 is not critically contributing to working memory (Eichenbaum, 2006; Eichenbaum  
458 et al., 1994). But an alternative view proposes that the hippocampus may  
459 contribute to any memory task, including working memory (Hannula and  
460 Ranganath, 2008; Libby et al., 2014), in particular in supporting high-precision  
461 binding (Borders et al., 2021). This latter possibility is challenged however by the  
462 fact that patients with DA presenting with severe hippocampal damage have  
463 repeatedly shown unimpaired working memory performance (Allen et al., 2014;  
464 Baddeley et al., 2011, 2010). Recent work extended these findings by showing  
465 that high resolution working memory performance was unimpaired, and even  
466 often superior, relative to control group in a patient with DA (Allen et al., 2022).  
467 Our observation of a negative correlation between uncus volume and working  
468 memory performance suggests that the perirhinal, entorhinal, and  
469 parahippocampal cortices normally involved in the binding of information in the  
470 short term (Miyashita, 2019) may be subject to plastic changes in patients with  
471 DA and that these plastic changes may depend on the degree of hippocampal  
472 damage. The possibility that the hippocampal damage in patients with DA may

473 not influence working memory performance directly, but indirectly via  
474 reorganization of the MTL circuit is explored below.

### 475 ***Functional hypotheses***

476 Experimental studies in nonhuman primates have reported similar paradoxical  
477 findings to those reported in the present study. Monkeys with small hippocampal  
478 lesions exhibit greater memory loss on Delayed Nonmatching-to-Sample (DNMS)  
479 task than that found in animals with greater damage (Bachevalier and Mishkin,  
480 1989). Furthermore, a positive correlation between the extent of damage to the  
481 hippocampus and scores on a DNMS task has been reported in experimentally  
482 lesioned monkeys (Murray and Mishkin, 1998). Several hypotheses have been  
483 proposed to explain why discrete lesions result in greater memory impairment  
484 (Bachevalier and Mishkin, 1989; Baxter and Murray, 2001; Beason-Held et al.,  
485 1999). However, it is difficult to relate these findings obtained following adult  
486 experimental lesions in the monkey to observations in patients with early  
487 hippocampal damage whose circuits might have undergone massive  
488 compensation. One hypothesis to explain our observations is that the level of  
489 hippocampal damage would likely have a strong direct influence on the  
490 organization of the medial temporal lobe memory circuits in the adult. Following  
491 an early event of hypoxia-ischemia, however, greater hippocampal damage might  
492 induce greater compensatory reconfigurations in the neural circuits and enable  
493 other structures, in particular the surrounding cortical areas normally recruited by  
494 the hippocampus, to assume important aspects of memory function. In contrast,  
495 when the hippocampus is only partially damaged, the information flow would  
496 remain present in the hippocampus and could result in incomplete, and possibly  
497 disruptive information processing. Our observation could thus reveal the existence  
498 of multiple, redundant routes within the residual hippocampal subregions and  
499 surrounding cortical areas in patients with developmental amnesia (Aggleton et  
500 al., 2000). These parallel circuits could compete for the control of behavior and  
501 disrupt perception and memory performance (Baxter and Murray, 2001).

502 Our findings are consistent with the hypothesis that a close relationship  
503 can be evidenced between the volume of remaining hippocampal subregions and  
504 the severity of cognitive deficits in patients with hippocampal damage, in the case  
505 of patients with DA this relationship was inverse. Our observations also provide  
506 further support for the model of hierarchical organization of cognitive memory  
507 (Mishkin et al., 1997) by proposing that surrounding cortical areas normally  
508 involved in the encoding of associative relations between decontextualized  
509 information (Miyashita, 2019) could reorganize to contribute to hippocampal  
510 function following early hippocampal damage. The limits of this reorganization,  
511 however, may be determined by the extent of damage to the hippocampal  
512 subregions.

513 Evidence for such reorganization has already been reported in a nonhuman  
514 primate model of developmental amnesia. Monkeys with early bilateral  
515 hippocampal lesion can learn new spatial relational information in striking  
516 contrast to monkeys with adult lesion (Banta Lavenex et al., 2006; Lavenex et al.,  
517 2007). Interestingly, in these monkeys with early hippocampal lesions, the  
518 surrounding cortical areas were preserved and were shown to contribute to spatial  
519 learning in the absence of functional hippocampal circuits (Chareyron et al.,  
520 2017).

521 One could speculate that the functional reorganization of the  
522 perihippocampal structures (normally devoted to the processing of  
523 decontextualized information) to compensate hippocampal function could, in turn,  
524 benefit the processing of semantic memory and lead to better context-free memory  
525 performance in patients (see: Kapur et al., 2013). Indications of increased memory  
526 performance have indeed been reported in two different patients with DA. Jonin et  
527 al. (2018) studied patient ‘KA’ presenting with 55% hippocampal volume  
528 reduction and preserved perihippocampal structures. While patient KA displayed  
529 few, if any, residual episodic abilities, this patient was able to accurately retrieve  
530 semantic memories, and show evidence of superior or even very superior access to  
531 these memories than controls. Another patient with DA, patient ‘Jon’, has often  
532 produced response accuracy levels that are at least higher than those of control  
533 participants in previous experimental explorations of visuospatial working  
534 memory (Allen et al., 2022, 2014; Baddeley et al., 2010). Jon was at least  
535 numerically superior to the control mean on recognition-based measures of shape-  
536 color binding (Baddeley et al., 2010). In measures of color-location memory,  
537 Jon’s recognition accuracy matched the highest achieving control participant,  
538 while his reconstruction performance was superior to 6 of the 7 controls (Allen et  
539 al., 2014). Across four tasks measuring binding between color and orientation or  
540 color and location using simultaneous or sequential presentation of stimuli, Jon’s  
541 response accuracy was high, and always numerically superior to the control mean  
542 (Allen et al., 2022).

543 These observations from single patients studies together with the present  
544 findings, obtained in a large cohort of patients with DA, support the hypothesis of  
545 a reorganization of the preserved perihippocampal areas following early  
546 hippocampal damage.

## 547 **Conclusions**

548 Our results have important implications for understanding the organization of  
549 memory following early hippocampal injury. These observations highlight the  
550 paradoxical finding that in patients with DA greater hippocampal damage can be  
551 associated with better performance in recall memory, Verbal comprehension  
552 Index, Working memory Index, Processing speed Index and spatial perception. In  
553 contrast, less severe damage leaving behind relatively preserved hippocampal  
554 subregions can lead to more pronounced cognitive deficits. These unexpected  
555 findings can disentangle the functional organization of the medial temporal lobe  
556 memory system, and attribute a central role in the compensation of memory and  
557 spatial cognition to extra-hippocampal structures in patients with early  
558 hippocampal damage.

## 559 **Materials and methods**

### 560 *Participants*

561 The patients with DA were characterized by (i) a history of episodes of hypoxia-  
562 ischemia in early life, (ii) quantified hippocampal volume reduction above 25%  
563 relative to a group of controls, and (iii) severely impaired episodic memory  
564 (Dziociol et al., 2017). The most common aetiology was perinatal hypoxic-

565 ischemic encephalopathy (Table S2). While long-term neurodevelopmental  
566 outcome depends on the severity of the hypoxic-ischemic episode, subtle  
567 cognitive deficits and behavioral alterations have been revealed through long-term  
568 evaluations even in mild forms of hypoxia-ischemia (de Vries and Jongmans,  
569 2010).

570 When all the volumetric estimates were completed, one of the patients,  
571 who presented with moderate memory deficits and only 11.0% hippocampal  
572 volume reduction associated with two unconfirmed episodes of prolonged seizures  
573 at age 4, was excluded from the DA group.

574 Also, we excluded from the DA group a patient with temporal lobe  
575 epilepsy presenting with a 25.8% hippocampal volume reduction, but without a  
576 documented episode of early hypoxia-ischemia and/or status epilepticus.  
577 Additionally, blinded neuroradiological examination carried out independently by  
578 one of the authors (WKC) revealed that this patient's MRI scan was entirely  
579 normal. The hippocampus, fornix and mammillary bodies were noted to have a  
580 normal appearance in contrast to all other patients with DA.

581 We report here hippocampal volume estimates in 32 control participants  
582 (16 females; mean age: 17.7 years, SD 7.7, range 8–38) and 23 patients with DA  
583 (11 females; mean age: 19.5 years, SD 9.0, range 8–40).

#### 584 ***Structural MRI***

585 Participants were either scanned with a 1.5T-MRI scanner (24 control  
586 participants, 16 patients with DA) or with a 3T-MRI scanner (8 control  
587 participants, 7 patients with DA).

588 Whole brain structural 1.5T-MRI scans were obtained using a Siemens  
589 Avanto Scanner, with a T1-weighted 3D FLASH sequence with the following  
590 parameters: repetition time 11ms; echo time 4.94ms; in-plane resolution  
591 1mm×1mm; slice thickness of 1mm (Cooper et al., 2011).

592 Whole brain structural 3T-MRI scans were obtained using a 3T Siemens  
593 MRI system with a 20 channel head coil. A T1-weighted magnetization-prepared  
594 rapid gradient-echo (MPRAGE) scan was acquired with the following parameters:  
595 in-plane resolution of 1mm×1mm; slice thickness of 1mm; repetition time of  
596 2,300ms; echo time of 2.74ms (Buck et al., 2019).

597 For the measurement of regions of interest (ROI) volumes, the data were  
598 reformatted into 1 mm-thick contiguous slices in the coronal plane. ROI cross-  
599 sectional areas were measured in all slices along the entire length of the  
600 hippocampus, entorhinal, perirhinal and parahippocampal cortices using ITK-  
601 SNAP (version 3.8.0; [www.itksnap.org](http://www.itksnap.org); Yushkevich et al., 2006). Manual tracing  
602 is still the gold standard for measuring hippocampal volume and is particularly  
603 appropriate for samples of relatively small size (Akudjedu et al., 2018), presenting  
604 with various levels of hippocampal atrophy (Schmidt et al., 2018), or including  
605 children and adolescents (Herten et al., 2019). All manual measurements of the  
606 ROIs were carried out by one of the authors (LJC) who remained blind to  
607 participant identity.

608 The hippocampus comprises the CA fields (CA3, CA2, CA1), the dentate  
609 gyrus (DG), subiculum, presubiculum, and parasubiculum (Amaral and Lavenex,  
610 2007). The human uncus [also termed the “uncal portion of the hippocampal  
611 formation” (Amaral et al., 1984)] is situated antero-medially and consists of  
612 slightly modified DG, CA3, CA2, CA1, and subiculum (Ding and Van Hoesen,

613 2015). For the segmentation of the hippocampus and its subregions, we followed  
614 the guide provided by Dalton et al. (Dalton et al., 2017). Given the difficulty to  
615 distinguish hippocampal CA fields on 1.5T and 3T-MRI acquisitions, we  
616 restricted our volumetric analyses to three ROIs: uncus [defined according to  
617 (Ding and Van Hoesen, 2015)], CA-DG (CA fields and dentate gyrus), and  
618 subicular complex (subiculum, presubiculum, and parasubiculum). The  
619 segmentation of the entorhinal, perirhinal and parahippocampal cortices was  
620 based on structural descriptions of human medial temporal lobe and  
621 segmentations protocols (Blaizot et al., 2010; Ding and Van Hoesen, 2010;  
622 Frankó et al., 2014; Insausti et al., 1998; Kivisaari et al., 2020).

623 The volumes in cubic millimeters were calculated by summing the number  
624 of voxels ( $1 \times 1 \times 1$  mm) for each ROI. The volume of the hippocampus as a whole  
625 was calculated as the sum of hippocampal subregions' volumes (uncus, CA-DG,  
626 subicular complex). We then used parametric tests as volumetric estimates of the  
627 hippocampal subregions and cortical areas were normally distributed (Shapiro-  
628 Wilk normality test; control: all  $P > .06$ ; DA: all  $P > .09$ ). There was no  
629 significant difference between volumetric estimates of the whole hippocampus or  
630 cortical areas obtained with the 1.5T-MRI scanner and the 3T-MRI scanner in  
631 control and DA groups (two-way ANOVA, both  $F < 1.3$ ; both  $P > .25$ ). Also there  
632 was no significant gender difference for the volumes of the whole hippocampus or  
633 cortical areas in control and DA groups (both  $F < 0.08$ ; both  $P > .79$ ). Volume  
634 estimates on 1.5T and 3T-MRI scans and volume estimates in males and females  
635 were thus presented together. There was a significant right larger than left volume  
636 asymmetry for the volume of the whole hippocampus in both control and DA  
637 groups (repeated measures two-way ANOVA:  $F_{(1,53)} = 19.2$ ;  $P < .001$ ; Tukey's  
638 HSD post-hoc test: both  $P < .004$ ). The right CA-DG subregions were  
639 significantly larger than the left in both control and DA groups ( $F_{(1,53)} = 26.1$ ;  $P < .001$ ;  
640 both  $P < .004$ ). There was no significant asymmetry for the volume of the  
641 other hippocampal subregions (all  $P > .05$ ). Also, there was no significant  
642 asymmetry for the volume of the entorhinal or perirhinal cortices (all  $P > .12$ ) but  
643 there was a significant right larger than left volume asymmetry for the volume of  
644 the parahippocampal cortex in the control group ( $F_{(1,53)} = 7.0$ ;  $P = .011$ ; Tukey's  
645 HSD post-hoc test:  $P = .009$ ). The volume of all the ROIs was calculated as the  
646 mean of the left and right hemisphere measurements.

647 Intracranial volume (ICV) was manually measured on the sagittal dataset with  
648 a 1-in-10 random and systematic sampling strategy. The ICV was normally  
649 distributed (Shapiro-Wilk normality test; control:  $P = .05$ ; DA:  $P = .23$ ). The ICV  
650 was 6.8% smaller in the DA group than in the control group ( $t_{(53)} = -2.70$ ;  $P = .009$ ).  
651 Corrections, derived from the regression line of control ROI volume ( $V$ )  
652 versus ICV, were then made for ICV based on the formula [ $\Delta V = a \times (\Delta ICV)$ ] where  
653 'a' is the regression coefficient.

#### 654 **WISC/WAIS**

655 The Wechsler Adult Intelligence Scale, 3rd Ed. (WAIS-III) and the Wechsler  
656 Intelligence Scale for Children, 4th Ed. (WISC-IV) provide four index scores:  
657 Verbal Comprehension Index, measuring understanding and expression of verbal  
658 concepts; Perceptual Reasoning Index, reflecting visuospatial perception and  
659 perceptuomotor manipulation; Working Memory Index, tracking on-line  
660 immediate memory and executive control; and Processing Speed Index,

661 measuring speed of visuoperceptual discrimination, and copying of number-  
662 symbol associations. The four index scores are expressed as standard scores with a  
663 mean of 100 and a standard deviation of 15.

664 **Scoring.** The WISC-IV or WAIS-III were administered to all patients with DA (N  
665 = 23, 11 females, mean age: 19.5 years, SD: 9.0, range: 8–40) and to 23 controls  
666 (13 females, mean age: 18.0 years, SD: 8.4, range: 8.2–38). For the analysis of the  
667 data, we then used parametric tests as the data were normally distributed in all  
668 four indexes (Shapiro–Wilk test of normality; Control: all  $P > .36$ ; DA: all  $P >$   
669  $.10$ ).  
670

### 671 ***The Doors and People Test***

672 The *Doors and People Test* was administered according to the instructions in the  
673 published manual (Baddeley et al., 1994), as described in detail in (Adlam et al.,  
674 2009; Patai et al., 2015). Briefly, for the verbal recall subtest (‘People’),  
675 participants were presented with four pictures of people and after three learning  
676 trials asked to recall their names cued by their profession. For the visual recall  
677 subtest (‘Shapes’), participants first copied, and drew the shapes from memory  
678 after three learning trials. For verbal recognition (‘Names’), participants were  
679 presented with a list of names, and then asked to recognize each one from a list of  
680 four alternatives. Finally, in the visual recognition subtest (‘Doors’), participants  
681 viewed a list of doors and then identified each one from a list of four alternatives.  
682 See Supplementary Information for more details.

683 **Scoring.** The *Doors and People Test* was administered to all patients with DA (N  
684 = 23, 11 females, mean age: 19.5 years, SD: 9.0, range: 8–40) and to 21 controls  
685 (11 females, mean age: 17.6 years, SD: 8.6, range: 8–38). One of the patients  
686 performed all but the ‘Names’ subtest (‘People’, ‘Doors’, ‘Shapes’: N = 23;  
687 ‘Names’: n = 22). Given that the DA group included individuals under the age of  
688 16, which is the first age band at which standard scores are available on the *Doors*  
689 *and People Test*, we used standard scores based on the scores of our control  
690 group; raw scores (SD): People, 28.2 (6.9); Doors, 18.9 (3.8); Shapes, 34.6 (2.7);  
691 Names, 18.6 (3.7). We converted patients’ and controls’ raw scores to z-scores  
692 relative to the control group’s scores. For the analysis of the data, we then used  
693 nonparametric tests as the data were not normally distributed in all four subtests  
694 (Shapiro–Wilk test of normality; Control:  $P < .001$ ; DA:  $P = .044$ ).

### 695 ***The Four Mountains Test***

696 The *Four Mountains Test* was developed to examine hippocampal contribution to  
697 perception and short-term memory for topographical and nonspatial information  
698 in spatial scenes (Hartley et al., 2007). Briefly, this test involves computer-  
699 generated landscapes containing four mountains. In the ‘Spatial Perception’ task,  
700 participants selected one picture that matched the sample image (the same place  
701 from a different viewpoint) from four alternatives. In the ‘Spatial Memory’ task,  
702 the sample image was presented for approximately 8 sec. After a 2 sec. delay,  
703 participants were presented with four choices and selected the one previously  
704 viewed. See Supplementary Information for more details.

705 **Scoring.** The *Four Mountains Test* was administered to 14 patients with DA (7  
706 females, mean age: 21.6 years, SD: 10.3, range: 8–40) and to 19 controls (11  
707 females, mean age: 16.9 years, SD: 7.8, range: 8–35). We converted patients’ raw  
708 scores to z-scores relative to the scores of our control group; raw scores (SD):



709 Perception, 11.6 (2.3); Memory, 9.95 (2.8). We then used nonparametric tests as  
710 the data in the Control group were not normally distributed [Shapiro–Wilk test of  
711 normality;  $P < .05$ ].

## 712 **Acknowledgments**

713 This work was supported by the UK Medical Research Council (program grant  
714 numbers G03000117 and G1002276).

715

716 We thank the participants and their families for their support of our research.

717

## 718 **Competing interests**

719 The authors declare no conflict of interest.

## 720 **References**

721 Adlam, A.-L.R., Malloy, M., Mishkin, M., Vargha-Khadem, F., 2009.

722 Dissociation between recognition and recall in developmental amnesia.

723 *Neuropsychologia* 47, 2207–2210.

724 <https://doi.org/10.1016/j.neuropsychologia.2009.01.038>

725 Aggleton, J.P., Vann, S.D., Oswald, C.J., Good, M., 2000. Identifying cortical  
726 inputs to the rat hippocampus that subserve allocentric spatial processes: a simple  
727 problem with a complex answer. *Hippocampus* 10, 466–474.

728 [https://doi.org/10.1002/1098-1063\(2000\)10:4<466::AID-HIPO13>3.0.CO;2-Y](https://doi.org/10.1002/1098-1063(2000)10:4<466::AID-HIPO13>3.0.CO;2-Y)

729 Akudjedu, T.N., Nabulsi, L., Makelyte, M., Scanlon, C., Hehir, S., Casey, H.,  
730 Ambati, S., Kenney, J., O’Donoghue, S., McDermott, E., Kilmartin, L., Dockery,  
731 P., McDonald, C., Hallahan, B., Cannon, D.M., 2018. A comparative study of  
732 segmentation techniques for the quantification of brain subcortical volume. *Brain*  
733 *Imaging Behav* 12, 1678–1695. <https://doi.org/10.1007/s11682-018-9835-y>

734 Allen, R.J., Atkinson, A.L., Vargha-Khadem, F., Baddeley, A.D., 2022. Intact  
735 high-resolution working memory binding in a patient with developmental amnesia  
736 and selective hippocampal damage. *Hippocampus* 32, 597–609.

737 <https://doi.org/10.1002/hipo.23452>

738 Allen, R.J., Vargha-Khadem, F., Baddeley, A.D., 2014. Item-location binding in  
739 working memory: is it hippocampus-dependent? *Neuropsychologia* 59, 74–84.

740 <https://doi.org/10.1016/j.neuropsychologia.2014.04.013>

741 Amaral, D.G., Insausti, R., Cowan, W.M., 1987. The entorhinal cortex of the  
742 monkey: I. Cytoarchitectonic organization. *J Comp Neurol* 264, 326–55.

743 Amaral, D.G., Insausti, R., Cowan, W.M., 1984. The commissural connections of  
744 the monkey hippocampal formation. *J. Comp. Neurol.* 224, 307–336.

745 <https://doi.org/10.1002/cne.902240302>

746 Amaral, D.G., Lavenex, P., 2007. Hippocampal neuroanatomy, in: *The*  
747 *Hippocampus Book*. Oxford University Press, Oxford, pp. 37–114.

- 748 Argyropoulos, G.P.D., Dell'Acqua, C., Butler, E., Loane, C., Roca-Fernandez, A.,  
749 Almozel, A., Drummond, N., Lage-Martinez, C., Cooper, E., Henson, R.N.,  
750 Butler, C.R., 2021. Functional Specialization of the Medial Temporal Lobes in  
751 Human Recognition Memory: Dissociating Effects of Hippocampal versus  
752 Parahippocampal Damage. *Cereb Cortex* bhab290.  
753 <https://doi.org/10.1093/cercor/bhab290>
- 754 Bachevalier, J., Mishkin, M., 1989. Mnemonic and neuropathological effects of  
755 occluding the posterior cerebral artery in *Macaca mulatta*. *Neuropsychologia* 27,  
756 83–105. [https://doi.org/10.1016/0028-3932\(89\)90092-4](https://doi.org/10.1016/0028-3932(89)90092-4)
- 757 Baddeley, A., Allen, R., Vargha-Khadem, F., 2010. Is the hippocampus necessary  
758 for visual and verbal binding in working memory? *Neuropsychologia* 48, 1089–  
759 1095. <https://doi.org/10.1016/j.neuropsychologia.2009.12.009>
- 760 Baddeley, A., Jarrold, C., Vargha-Khadem, F., 2011. Working memory and the  
761 hippocampus. *J Cogn Neurosci* 23, 3855–3861.  
762 [https://doi.org/10.1162/jocn\\_a\\_00066](https://doi.org/10.1162/jocn_a_00066)
- 763 Baddeley, A.D., 2020. On trying to prove Endel Tulving wrong: A revised modal  
764 model of amnesia. *Neuropsychologia* 148, 107590.  
765 <https://doi.org/10.1016/j.neuropsychologia.2020.107590>
- 766 Baddeley, A.D., Emslie, H., Nimmo-Smith, I., 1994. *Doors and people : a test of*  
767 *visual and verbal recall and recognition*. Bury St Edmunds : Thames Valley Test  
768 Company, UK.
- 769 Banta Lavenex, P., Amaral, D.G., Lavenex, P., 2006. Hippocampal lesion  
770 prevents spatial relational learning in adult macaque monkeys. *J. Neurosci.* 26,  
771 4546–4558. <https://doi.org/10.1523/JNEUROSCI.5412-05.2006>
- 772 Bartsch, T., Döhring, J., Reuter, S., Finke, C., Rohr, A., Brauer, H., Deuschl, G.,  
773 Jansen, O., 2015. Selective neuronal vulnerability of human hippocampal CA1  
774 neurons: lesion evolution, temporal course, and pattern of hippocampal damage in  
775 diffusion-weighted MR imaging. *J. Cereb. Blood Flow Metab.* 35, 1836–1845.  
776 <https://doi.org/10.1038/jcbfm.2015.137>
- 777 Baxter, M.G., Murray, E.A., 2001. Opposite relationship of hippocampal and  
778 rhinal cortex damage to delayed nonmatching-to-sample deficits in monkeys.  
779 *Hippocampus* 11, 61–71. [https://doi.org/10.1002/1098-1063\(2001\)11:1<61::AID-  
780 HIPO1021>3.0.CO;2-Z](https://doi.org/10.1002/1098-1063(2001)11:1<61::AID-HIPO1021>3.0.CO;2-Z)
- 781 Bayley, P.J., Squire, L.R., 2005. Failure to acquire new semantic knowledge in  
782 patients with large medial temporal lobe lesions. *Hippocampus* 15, 273–280.  
783 <https://doi.org/10.1002/hipo.20057>
- 784 Beason-Held, L.L., Rosene, D.L., Killiany, R.J., Moss, M.B., 1999. Hippocampal  
785 formation lesions produce memory impairment in the rhesus monkey.  
786 *Hippocampus* 9, 562–574. [https://doi.org/10.1002/\(SICI\)1098-  
787 1063\(1999\)9:5<562::AID-HIPO10>3.0.CO;2-X](https://doi.org/10.1002/(SICI)1098-1063(1999)9:5<562::AID-HIPO10>3.0.CO;2-X)
- 788 Blaizot, X., Mansilla, F., Insausti, A.M., Constans, J.M., Salinas-Alamán, A., Pró-  
789 Sistiaga, P., Mohedano-Moriano, A., Insausti, R., 2010. The human  
790 parahippocampal region: I. Temporal pole cytoarchitectonic and MRI correlation.  
791 *Cereb Cortex* 20, 2198–2212. <https://doi.org/10.1093/cercor/bhp289>

- 792 Boccara, C.N., Sargolini, F., Thoresen, V.H., Solstad, T., Witter, M.P., Moser,  
793 E.I., Moser, M.-B., 2010. Grid cells in pre- and parasubiculum. *Nat. Neurosci.* 13,  
794 987–994. <https://doi.org/10.1038/nn.2602>
- 795 Borders, A.A., Ranganath, C., Yonelinas, A.P., 2021. The hippocampus supports  
796 high-precision binding in visual working memory. *Hippocampus*.  
797 <https://doi.org/10.1002/hipo.23401>
- 798 Buck, S., Bastos, F., Baldeweg, T., Vargha-Khadem, F., 2019. A Functional MRI  
799 Paradigm Suitable for Language and Memory Mapping in Pediatric Temporal  
800 Lobe Epilepsy. *Front Neurol* 10, 1384. <https://doi.org/10.3389/fneur.2019.01384>
- 801 Chareyron, L.J., Banta Lavenex, P., Amaral, D.G., Lavenex, P., 2017. Functional  
802 organization of the medial temporal lobe memory system following neonatal  
803 hippocampal lesion in rhesus monkeys. *Brain Struct Funct* 222, 3899–3914.  
804 <https://doi.org/10.1007/s00429-017-1441-z>
- 805 Cooper, J.M., Gadian, D.G., Jentschke, S., Goldman, A., Munoz, M., Pitts, G.,  
806 Banks, T., Chong, W.K., Hoskote, A., Deanfield, J., Baldeweg, T., de Haan, M.,  
807 Mishkin, M., Vargha-Khadem, F., 2015. Neonatal hypoxia, hippocampal atrophy,  
808 and memory impairment: evidence of a causal sequence. *Cereb Cortex* 25, 1469–  
809 1476. <https://doi.org/10.1093/cercor/bht332>
- 810 Cooper, J.M., Vargha-Khadem, F., Gadian, D.G., Maguire, E.A., 2011. The effect  
811 of hippocampal damage in children on recalling the past and imagining new  
812 experiences. *Neuropsychologia* 49, 1843–1850.  
813 <https://doi.org/10.1016/j.neuropsychologia.2011.03.008>
- 814 Dalton, M.A., Maguire, E.A., 2017. The pre/parasubiculum: a hippocampal hub  
815 for scene-based cognition? *Curr Opin Behav Sci* 17, 34–40.  
816 <https://doi.org/10.1016/j.cobeha.2017.06.001>
- 817 Dalton, M.A., Zeidman, P., Barry, D.N., Williams, E., Maguire, E.A., 2017.  
818 Segmenting subregions of the human hippocampus on structural magnetic  
819 resonance image scans: An illustrated tutorial. *Brain Neurosci Adv* 1,  
820 2398212817701448. <https://doi.org/10.1177/2398212817701448>
- 821 de Vries, L.S., Jongmans, M.J., 2010. Long-term outcome after neonatal hypoxic-  
822 ischaemic encephalopathy. *Arch. Dis. Child. Fetal Neonatal Ed.* 95, F220-224.  
823 <https://doi.org/10.1136/adc.2008.148205>
- 824 Ding, S.-L., 2013. Comparative anatomy of the prosubiculum, subiculum,  
825 presubiculum, postsubiculum, and parasubiculum in human, monkey, and rodent.  
826 *J. Comp. Neurol.* 521, 4145–4162. <https://doi.org/10.1002/cne.23416>
- 827 Ding, S.-L., Van Hoesen, G.W., 2015. Organization and Detailed Parcellation of  
828 Human Hippocampal Head and Body Regions Based on a Combined Analysis of  
829 Cyto- and Chemoarchitecture. *J. Comp. Neurol.* 523, 2233–2253.  
830 <https://doi.org/10.1002/cne.23786>
- 831 Ding, S.-L., Van Hoesen, G.W., 2010. Borders, extent, and topography of human  
832 perirhinal cortex as revealed using multiple modern neuroanatomical and  
833 pathological markers. *Hum Brain Mapp* 31, 1359–1379.  
834 <https://doi.org/10.1002/hbm.20940>
- 835 Dzieciol, A.M., Bachevalier, J., Saleem, K.S., Gadian, D.G., Saunders, R., Chong,

- 836 W.K.K., Banks, T., Mishkin, M., Vargha-Khadem, F., 2017. Hippocampal and  
837 diencephalic pathology in developmental amnesia. *Cortex* 86, 33–44.  
838 <https://doi.org/10.1016/j.cortex.2016.09.016>
- 839 Eichenbaum, H., 2006. Remembering: functional organization of the declarative  
840 memory system. *Curr Biol* 16, R643–645.  
841 <https://doi.org/10.1016/j.cub.2006.07.026>
- 842 Eichenbaum, H., Otto, T., Cohen, N.J., 1994. Two functional components of the  
843 hippocampal memory system. *Behavioral and Brain Sciences* 17, 449–517.  
844 <https://doi.org/10.1017/S0140525X00035391>
- 845 Elward, R.L., Rugg, M.D., Vargha-Khadem, F., 2021. When the brain, but not the  
846 person, remembers: Cortical reinstatement is modulated by retrieval goal in  
847 developmental amnesia. *Neuropsychologia* 154, 107788.  
848 <https://doi.org/10.1016/j.neuropsychologia.2021.107788>
- 849 Elward, R.L., Vargha-Khadem, F., 2018. Semantic memory in developmental  
850 amnesia. *Neurosci. Lett.* 680, 23–30. <https://doi.org/10.1016/j.neulet.2018.04.040>
- 851 Erdem, A., Yaşargil, G., Roth, P., 1993. Microsurgical anatomy of the  
852 hippocampal arteries. *J. Neurosurg.* 79, 256–265.  
853 <https://doi.org/10.3171/jns.1993.79.2.0256>
- 854 Frankó, E., Insausti, A.M., Artacho-Pérula, E., Insausti, R., Chavoix, C., 2014.  
855 Identification of the human medial temporal lobe regions on magnetic resonance  
856 images. *Hum Brain Mapp* 35, 248–256. <https://doi.org/10.1002/hbm.22170>
- 857 Geva, S., Jentschke, S., Argyropoulos, G.P.D., Chong, W.K., Gadian, D.G.,  
858 Vargha-Khadem, F., 2020. Volume reduction of caudate nucleus is associated  
859 with movement coordination deficits in patients with hippocampal atrophy due to  
860 perinatal hypoxia-ischaemia. *Neuroimage Clin* 28, 102429.  
861 <https://doi.org/10.1016/j.nicl.2020.102429>
- 862 Guderian, S., Dzieciol, A.M., Gadian, D.G., Jentschke, S., Doeller, C.F., Burgess,  
863 N., Mishkin, M., Vargha-Khadem, F., 2015. Hippocampal Volume Reduction in  
864 Humans Predicts Impaired Allocentric Spatial Memory in Virtual-Reality  
865 Navigation. *J. Neurosci.* 35, 14123–14131.  
866 <https://doi.org/10.1523/JNEUROSCI.0801-15.2015>
- 867 Hannula, D.E., Ranganath, C., 2008. Medial temporal lobe activity predicts  
868 successful relational memory binding. *J Neurosci* 28, 116–124.  
869 <https://doi.org/10.1523/JNEUROSCI.3086-07.2008>
- 870 Hartley, T., Bird, C.M., Chan, D., Cipolotti, L., Husain, M., Vargha-Khadem, F.,  
871 Burgess, N., 2007. The hippocampus is required for short-term topographical  
872 memory in humans. *Hippocampus* 17, 34–48. <https://doi.org/10.1002/hipo.20240>
- 873 Herten, A., Konrad, K., Krinzing, H., Seitz, J., von Polier, G.G., 2019. Accuracy  
874 and bias of automatic hippocampal segmentation in children and adolescents.  
875 *Brain Struct Funct* 224, 795–810. <https://doi.org/10.1007/s00429-018-1802-2>
- 876 Hodgetts, C.J., Voets, N.L., Thomas, A.G., Clare, S., Lawrence, A.D., Graham,  
877 K.S., 2017. Ultra-High-Field fMRI Reveals a Role for the Subiculum in Scene  
878 Perceptual Discrimination. *J. Neurosci.* 37, 3150–3159.  
879 <https://doi.org/10.1523/JNEUROSCI.3225-16.2017>

- 880 Huther, G., Dörfl, J., Van der Loos, H., Jeanmonod, D., 1998. Microanatomic and  
881 vascular aspects of the temporomesial region. *Neurosurgery* 43, 1118–1136.  
882 <https://doi.org/10.1097/00006123-199811000-00065>
- 883 Insausti, R., Juottonen, K., Soininen, H., Insausti, A.M., Partanen, K., Vainio, P.,  
884 Laakso, M.P., Pitkänen, A., 1998. MR volumetric analysis of the human  
885 entorhinal, perirhinal, and temporopolar cortices. *AJNR Am J Neuroradiol* 19,  
886 659–671.
- 887 Jabès, A., Lavenex, P.B., Amaral, D.G., Lavenex, P., 2011. Postnatal  
888 development of the hippocampal formation: a stereological study in macaque  
889 monkeys. *J. Comp. Neurol.* 519, 1051–1070. <https://doi.org/10.1002/cne.22549>
- 890 Jabès, A., Nelson, C.A., 2015. 20 Years after “The ontogeny of human memory:  
891 A cognitive neuroscience perspective,” where are we? *International Journal of*  
892 *Behavioral Development* 39, 293–303.  
893 <https://doi.org/10.1177/0165025415575766>
- 894 Jonin, P.-Y., Besson, G., La Joie, R., Pariente, J., Belliard, S., Barillot, C.,  
895 Barbeau, E.J., 2018. Superior explicit memory despite severe developmental  
896 amnesia: In-depth case study and neural correlates. *Hippocampus* 28, 867–885.  
897 <https://doi.org/10.1002/hipo.23010>
- 898 Kapur, N., Cole, J., Manly, T., Viskontas, I., Ninteman, A., Hasher, L., Pascual-  
899 Leone, A., 2013. Positive clinical neuroscience: explorations in positive  
900 neurology. *Neuroscientist* 19, 354–369.  
901 <https://doi.org/10.1177/1073858412470976>
- 902 Kivisaari, S.L., Probst, A., Taylor, K.I., 2020. The Perirhinal, Entorhinal, and  
903 Parahippocampal Cortices and Hippocampus: An Overview of Functional  
904 Anatomy and Protocol for Their Segmentation in MR Images, in: Ulmer, S.,  
905 Jansen, O. (Eds.), *FMRI: Basics and Clinical Applications*. Springer International  
906 Publishing, Cham, pp. 355–383. [https://doi.org/10.1007/978-3-030-41874-8\\_24](https://doi.org/10.1007/978-3-030-41874-8_24)
- 907 Kondo, H., Lavenex, P., Amaral, D.G., 2009. Intrinsic connections of the  
908 macaque monkey hippocampal formation: II. CA3 connections. *J. Comp. Neurol.*  
909 515, 349–377. <https://doi.org/10.1002/cne.22056>
- 910 Lavenex, P., Lavenex, P.B., Amaral, D.G., 2007. Spatial relational learning  
911 persists following neonatal hippocampal lesions in macaque monkeys. *Nat.*  
912 *Neurosci.* 10, 234–239. <https://doi.org/10.1038/nn1820>
- 913 Lee, S.A., Miller, J.F., Watrous, A.J., Sperling, M.R., Sharan, A., Worrell, G.A.,  
914 Berry, B.M., Aronson, J.P., Davis, K.A., Gross, R.E., Lega, B., Sheth, S., Das,  
915 S.R., Stein, J.M., Gorniak, R., Rizzuto, D.S., Jacobs, J., 2018.  
916 Electrophysiological Signatures of Spatial Boundaries in the Human Subiculum.  
917 *J. Neurosci.* 38, 3265–3272. <https://doi.org/10.1523/JNEUROSCI.3216-17.2018>
- 918 Lever, C., Burton, S., Jeewajee, A., O’Keefe, J., Burgess, N., 2009. Boundary  
919 vector cells in the subiculum of the hippocampal formation. *J. Neurosci.* 29,  
920 9771–9777. <https://doi.org/10.1523/JNEUROSCI.1319-09.2009>
- 921 Libby, L.A., Hannula, D.E., Ranganath, C., 2014. Medial temporal lobe coding of  
922 item and spatial information during relational binding in working memory. *J*  
923 *Neurosci* 34, 14233–14242. <https://doi.org/10.1523/JNEUROSCI.0655-14.2014>

- 924 Liebeskind, D.S., 2003. Collateral circulation. *Stroke* 34, 2279–2284.  
925 <https://doi.org/10.1161/01.STR.0000086465.41263.06>
- 926 Maguire, E.A., Vargha-Khadem, F., Mishkin, M., 2001. The effects of bilateral  
927 hippocampal damage on fMRI regional activations and interactions during  
928 memory retrieval. *Brain* 124, 1156–1170.  
929 <https://doi.org/10.1093/brain/124.6.1156>
- 930 Manns, J.R., Hopkins, R.O., Squire, L.R., 2003. Semantic Memory and the  
931 Human Hippocampus. *Neuron* 38, 127–133. [https://doi.org/10.1016/S0896-6273\(03\)00146-6](https://doi.org/10.1016/S0896-6273(03)00146-6)
- 933 Marinković, S., Milisavljević, M., Puskas, L., 1992. Microvascular anatomy of the  
934 hippocampal formation. *Surg Neurol* 37, 339–349. [https://doi.org/10.1016/0090-3019\(92\)90001-4](https://doi.org/10.1016/0090-3019(92)90001-4)
- 936 Matsumoto, N., Kitanishi, T., Mizuseki, K., 2019. The subiculum: Unique  
937 hippocampal hub and more. *Neurosci. Res.* 143, 1–12.  
938 <https://doi.org/10.1016/j.neures.2018.08.002>
- 939 Mishkin, M., Suzuki, W.A., Gadian, D.G., Vargha-Khadem, F., 1997.  
940 Hierarchical Organization of Cognitive Memory. *Philosophical Transactions:*  
941 *Biological Sciences* 352, 1461–1467.
- 942 Miyashita, Y., 2019. Perirhinal circuits for memory processing. *Nature Reviews*  
943 *Neuroscience* 20, 577–592. <https://doi.org/10.1038/s41583-019-0213-6>
- 944 Murray, E.A., Mishkin, M., 1998. Object recognition and location memory in  
945 monkeys with excitotoxic lesions of the amygdala and hippocampus. *J. Neurosci.*  
946 18, 6568–6582.
- 947 Patai, E.Z., Gadian, D.G., Cooper, J.M., Dzieciol, A.M., Mishkin, M., Vargha-  
948 Khadem, F., 2015. Extent of hippocampal atrophy predicts degree of deficit in  
949 recall. *Proc. Natl. Acad. Sci. U.S.A.* 112, 12830–12833.  
950 <https://doi.org/10.1073/pnas.1511904112>
- 951 Perosa, V., Priester, A., Ziegler, G., Cardenas-Blanco, A., Dobisch, L., Spallazzi,  
952 M., Assmann, A., Maass, A., Speck, O., Oltmer, J., Heinze, H.-J., Schreiber, S.,  
953 Düzel, E., 2020. Hippocampal vascular reserve associated with cognitive  
954 performance and hippocampal volume. *Brain* 143, 622–634.  
955 <https://doi.org/10.1093/brain/awz383>
- 956 Picard, L., Mayor-Dubois, C., Maeder, P., Kalenzaga, S., Abram, M., Duval, C.,  
957 Eustache, F., Roulet-Perez, E., Piolino, P., 2013. Functional independence within  
958 the self-memory system: new insights from two cases of developmental amnesia.  
959 *Cortex* 49, 1463–1481. <https://doi.org/10.1016/j.cortex.2012.10.003>
- 960 Rabin, J.S., Olsen, R.K., Gilboa, A., Buchsbaum, B.R., Rosenbaum, R.S., 2016.  
961 Using fMRI to understand event construction in developmental amnesia.  
962 *Neuropsychologia* 90, 261–273.  
963 <https://doi.org/10.1016/j.neuropsychologia.2016.07.036>
- 964 Rempel-Clower, N.L., Zola, S.M., Squire, L.R., Amaral, D.G., 1996. Three cases  
965 of enduring memory impairment after bilateral damage limited to the hippocampal  
966 formation. *J. Neurosci.* 16, 5233–5255.

- 967 Robertson, R.G., Rolls, E.T., Georges-François, P., Panzeri, S., 1999. Head  
968 direction cells in the primate pre-subiculum. *Hippocampus* 9, 206–219.  
969 [https://doi.org/10.1002/\(SICI\)1098-1063\(1999\)9:3<206::AID-HIPO2>3.0.CO;2-](https://doi.org/10.1002/(SICI)1098-1063(1999)9:3<206::AID-HIPO2>3.0.CO;2-)  
970 H
- 971 Rosenbaum, R.S., Cassidy, B.N., Herdman, K.A., 2015. Patterns of preserved and  
972 impaired spatial memory in a case of developmental amnesia. *Front Hum*  
973 *Neurosci* 9, 196. <https://doi.org/10.3389/fnhum.2015.00196>
- 974 Rosene, D.L., Van Hoesen, G.W., 1977. Hippocampal efferents reach widespread  
975 areas of cerebral cortex and amygdala in the rhesus monkey. *Science* 198, 315–  
976 317.
- 977 Saunders, R.C., Rosene, D.L., 1988. A comparison of the efferents of the  
978 amygdala and the hippocampal formation in the rhesus monkey: I. Convergence  
979 in the entorhinal, prorrhinal, and perirhinal cortices. *Journal of Comparative*  
980 *Neurology* 271, 153–184. <https://doi.org/10.1002/cne.902710202>
- 981 Schmidt, M.F., Storrs, J.M., Freeman, K.B., Jack, C.R., Turner, S.T., Griswold,  
982 M.E., Mosley, T.H., 2018. A comparison of manual tracing and FreeSurfer for  
983 estimating hippocampal volume over the adult lifespan. *Hum Brain Mapp* 39,  
984 2500–2513. <https://doi.org/10.1002/hbm.24017>
- 985 Schmidt-Kastner, R., Freund, T.F., 1991. Selective vulnerability of the  
986 hippocampus in brain ischemia. *Neuroscience* 40, 599–636.  
987 [https://doi.org/10.1016/0306-4522\(91\)90001-5](https://doi.org/10.1016/0306-4522(91)90001-5)
- 988 Schulze, K., Vargha-Khadem, F., Mishkin, M., 2012. Test of a motor theory of  
989 long-term auditory memory. *Proc. Natl. Acad. Sci. U.S.A.* 109, 7121–7125.  
990 <https://doi.org/10.1073/pnas.1204717109>
- 991 Scoville, W.B., Milner, B., 1957. Loss of recent memory after bilateral  
992 hippocampal lesions. *J. Neurol. Neurosurg. Psychiatr.* 20, 11–21.
- 993 Shrager, Y., Levy, D.A., Hopkins, R.O., Squire, L.R., 2008. Working memory  
994 and the organization of brain systems. *J Neurosci* 28, 4818–4822.  
995 <https://doi.org/10.1523/JNEUROSCI.0710-08.2008>
- 996 Torromino, G., Autore, L., Khalil, V., Mastroilli, V., Griguoli, M., Pignataro, A.,  
997 Centofante, E., Biasini, G.M., De Turrís, V., Ammassari-Teule, M., Rinaldi, A.,  
998 Mele, A., 2019. Offline ventral subiculum-ventral striatum serial communication  
999 is required for spatial memory consolidation. *Nat Commun* 10, 5721.  
1000 <https://doi.org/10.1038/s41467-019-13703-3>
- 1001 Vargha-Khadem, F., Cacucci, F., 2021. A brief history of developmental amnesia.  
1002 *Neuropsychologia* 150, 107689.  
1003 <https://doi.org/10.1016/j.neuropsychologia.2020.107689>
- 1004 Vargha-Khadem, F., Gadian, D.G., Watkins, K.E., Connelly, A., Van Paesschen,  
1005 W., Mishkin, M., 1997. Differential effects of early hippocampal pathology on  
1006 episodic and semantic memory. *Science* 277, 376–380.  
1007 <https://doi.org/10.1126/science.277.5324.376>
- 1008 Vargha-Khadem, F., Salmond, C.H., Watkins, K.E., Friston, K.J., Gadian, D.G.,  
1009 Mishkin, M., 2003. Developmental amnesia: effect of age at injury. *Proc Natl*  
1010 *Acad Sci U S A* 100, 10055–10060. <https://doi.org/10.1073/pnas.1233756100>

- 1011 Verfaellie, M., Koseff, P., Alexander, M.P., 2000. Acquisition of novel semantic  
1012 information in amnesia: effects of lesion location. *Neuropsychologia* 38, 484–492.  
1013 [https://doi.org/10.1016/S0028-3932\(99\)00089-5](https://doi.org/10.1016/S0028-3932(99)00089-5)
- 1014 Wang, X., Michaelis, E.K., 2010. Selective neuronal vulnerability to oxidative  
1015 stress in the brain. *Front Aging Neurosci* 2, 12.  
1016 <https://doi.org/10.3389/fnagi.2010.00012>
- 1017 Witter, M.P., Amaral, D.G., 2020. The entorhinal cortex of the monkey: VI.  
1018 Organization of projections from the hippocampus, subiculum, presubiculum, and  
1019 parasubiculum. *Journal of Comparative Neurology* doi: 10.1002/cne.24983.  
1020 <https://doi.org/10.1002/cne.24983>
- 1021 Yushkevich, P.A., Piven, J., Hazlett, H.C., Smith, R.G., Ho, S., Gee, J.C., Gerig,  
1022 G., 2006. User-guided 3D active contour segmentation of anatomical structures:  
1023 significantly improved efficiency and reliability. *Neuroimage* 31, 1116–1128.  
1024 <https://doi.org/10.1016/j.neuroimage.2006.01.015>
- 1025 Zeidman, P., Lutti, A., Maguire, E.A., 2015. Investigating the functions of  
1026 subregions within anterior hippocampus. *Cortex* 73, 240–256.  
1027 <https://doi.org/10.1016/j.cortex.2015.09.002>
- 1028 Zeidman, P., Maguire, E.A., 2016. Anterior hippocampus: the anatomy of  
1029 perception, imagination and episodic memory. *Nat. Rev. Neurosci.* 17, 173–182.  
1030 <https://doi.org/10.1038/nrn.2015.24>
- 1031 Zola-Morgan, S., Squire, L.R., Amaral, D.G., 1986. Human amnesia and the  
1032 medial temporal region: enduring memory impairment following a bilateral lesion  
1033 limited to field CA1 of the hippocampus. *J. Neurosci.* 6, 2950–2967.
- 1034
- 1035
